# Supplementary material for: From RNA-seq reads to differential expression results
Source: Springer Nature journal article supplement (doi:10.1186/gb-2010-11-12-220), 2010-01-01
Supplement: 13059_2010_2518_MOESM2_ESM.pdf [file 13059_2010_2518_MOESM2_ESM.pdf]

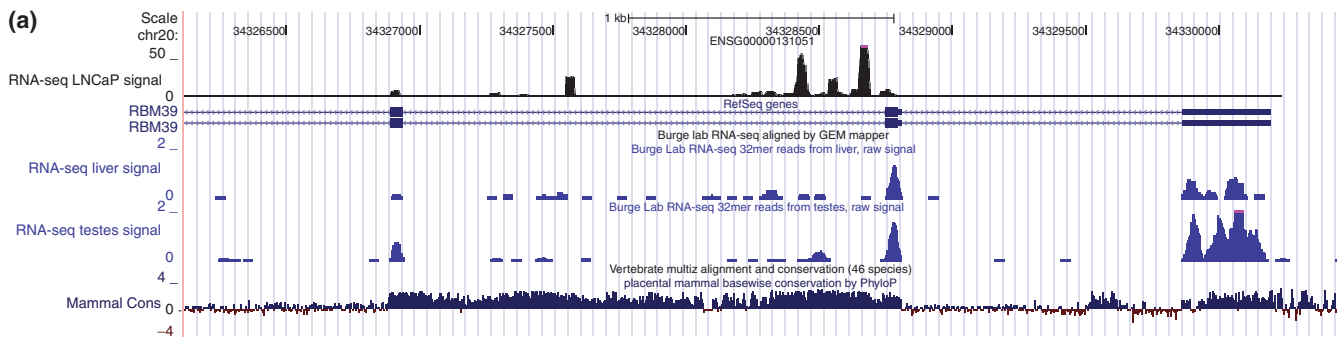

**(b)**

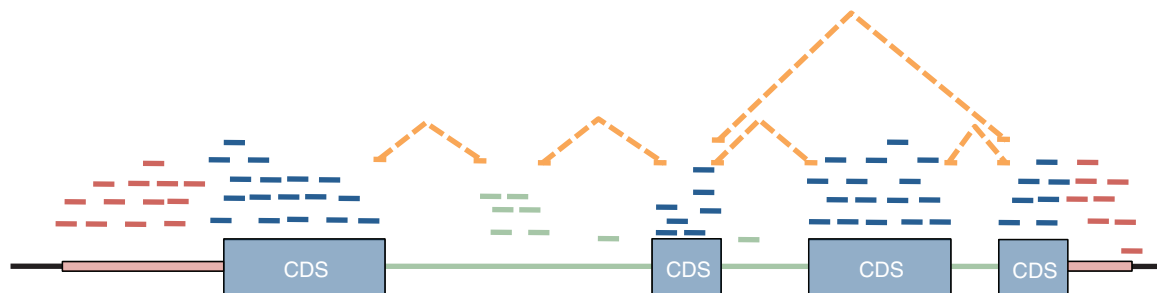

**Key:**

— Coding sequence

— Introns

— Exons

— Splice junctions
